# Supplementary material for: NMR metabolomics as a complementary tool to brix-acid tests for navel orange quality control of long-term cold storage
Source: PubMed Central journal article supplement (PMC11615199; doi:10.1038/s41598-024-77871-z), 2024-12-03
Supplement: 41598_2024_77871_MOESM1_ESM.pdf [file 41598_2024_77871_MOESM1_ESM.pdf]

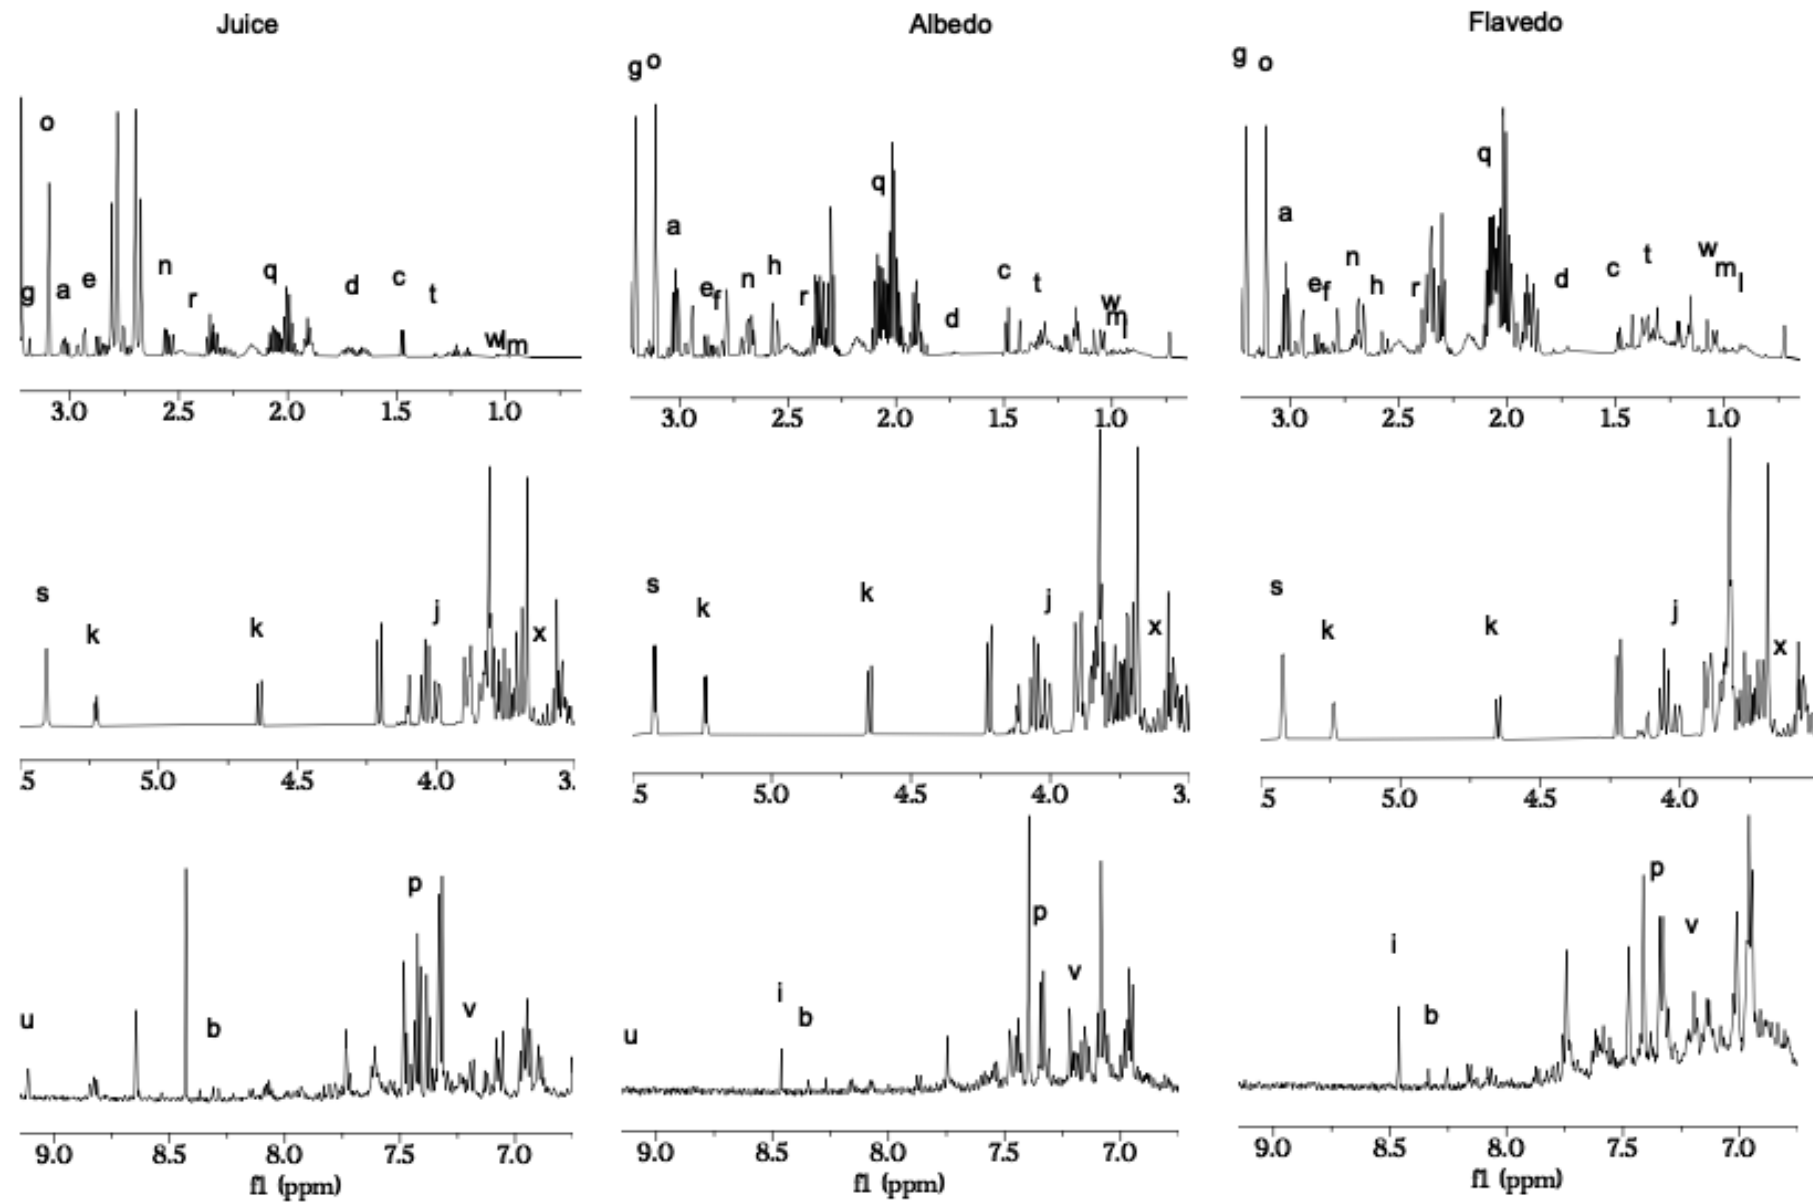

**Figure S1:** Representative  $^1\text{H}$  NMR spectra of Juice, Albedo and Flavedo samples. The metabolites are identified as follows. a) 4-Aminobutyrate, b) Adenosine, c) Alanine, d) Arginine, e) Asparagine, f) Aspartate, g) Choline, h) Citrate, i) Formate, j) Fructose, k) Glucose, l) Isoleucine, m) Leucine, n) Malate, o) Malonate, p) Phenylalanine, q) Proline, r) Succinate, s) Sucrose, t) Threonine, u) Trigonelline, v) Tyrosine, w) Valine, x) myo-Inositol

## Juice

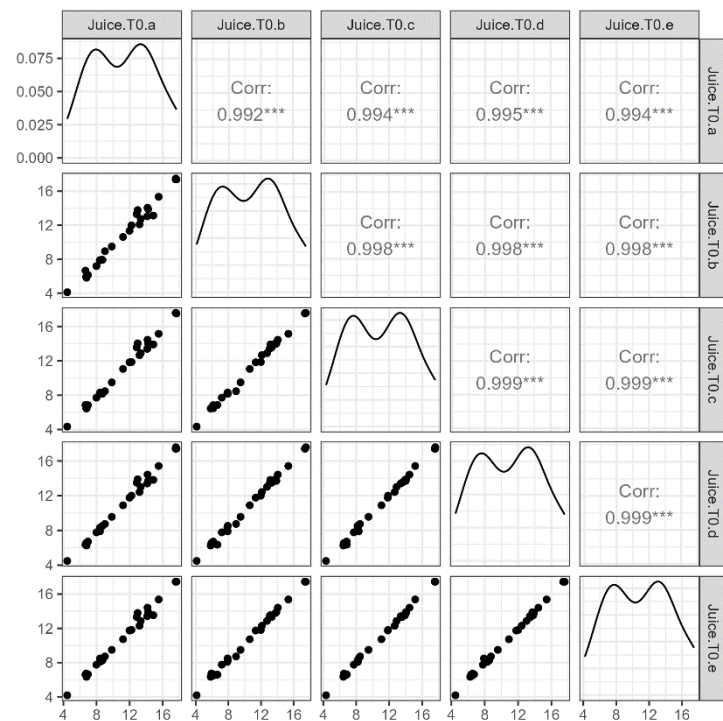

## Albedo

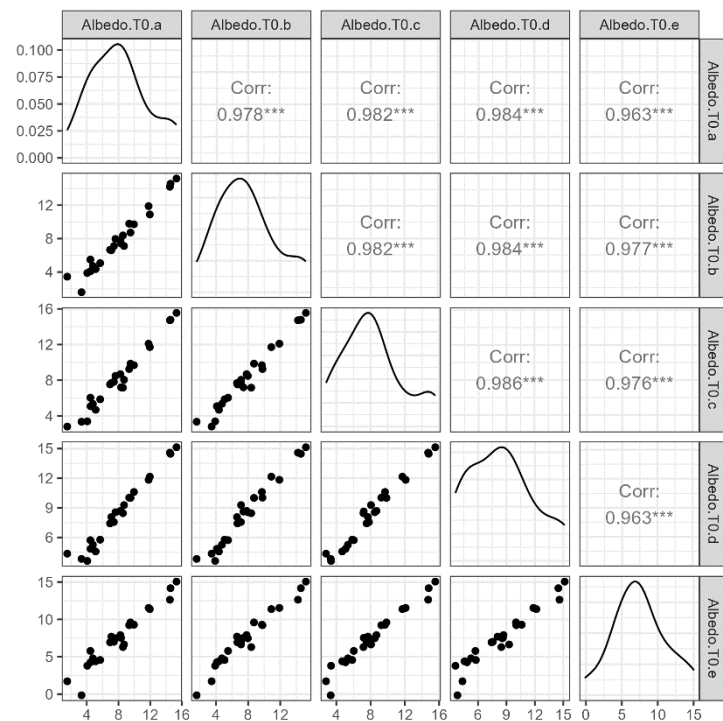

## Flavedo

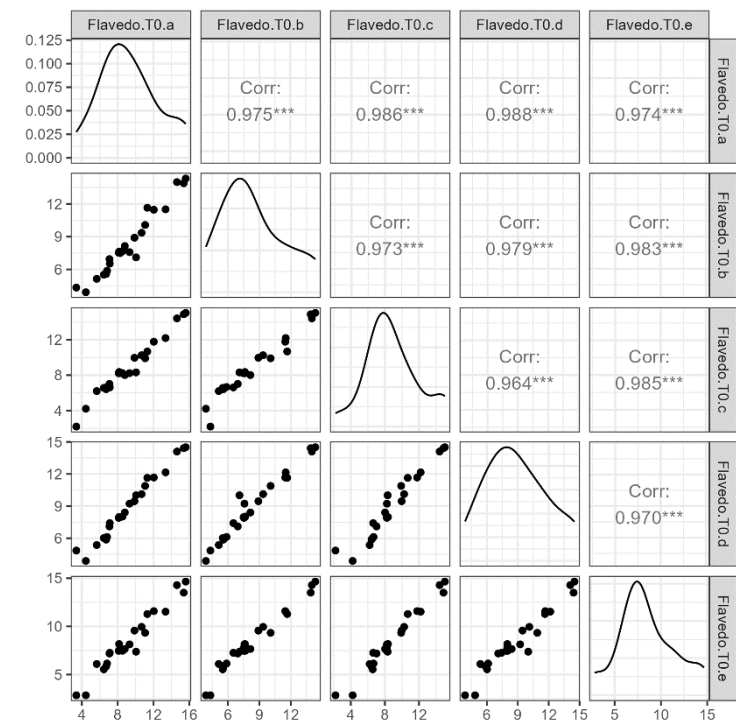

Figure S2: Correlation of the replicate samples. To test the reproducibility of the experimental data, a correlation analysis of the replicate data was performed. Representative replicates of the juice, albedo and flavedo samples (week 0) shows a correlation coefficient of > 0.97.

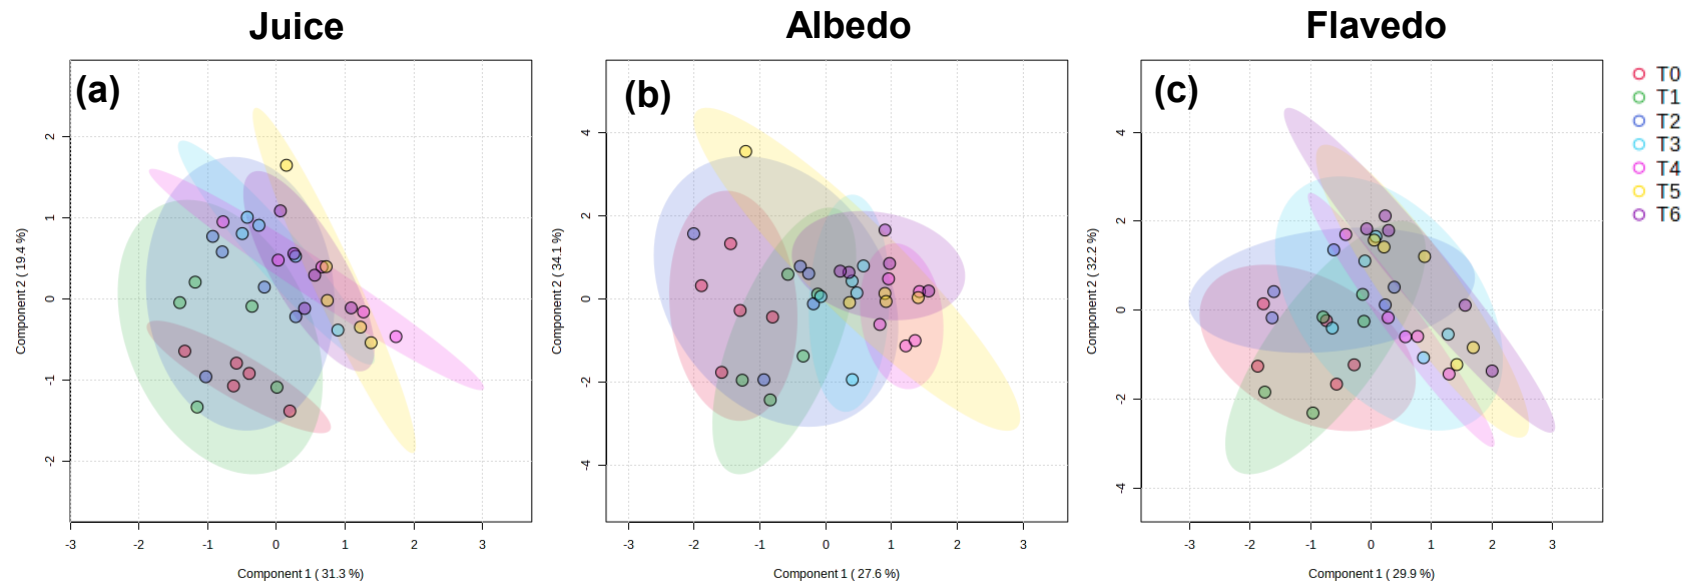

Figure S3: Principal component analysis (PCA). (a) Juice (b) Albedo, and (c) Flavedo. T0 to T6 represents the weeks zero to six.

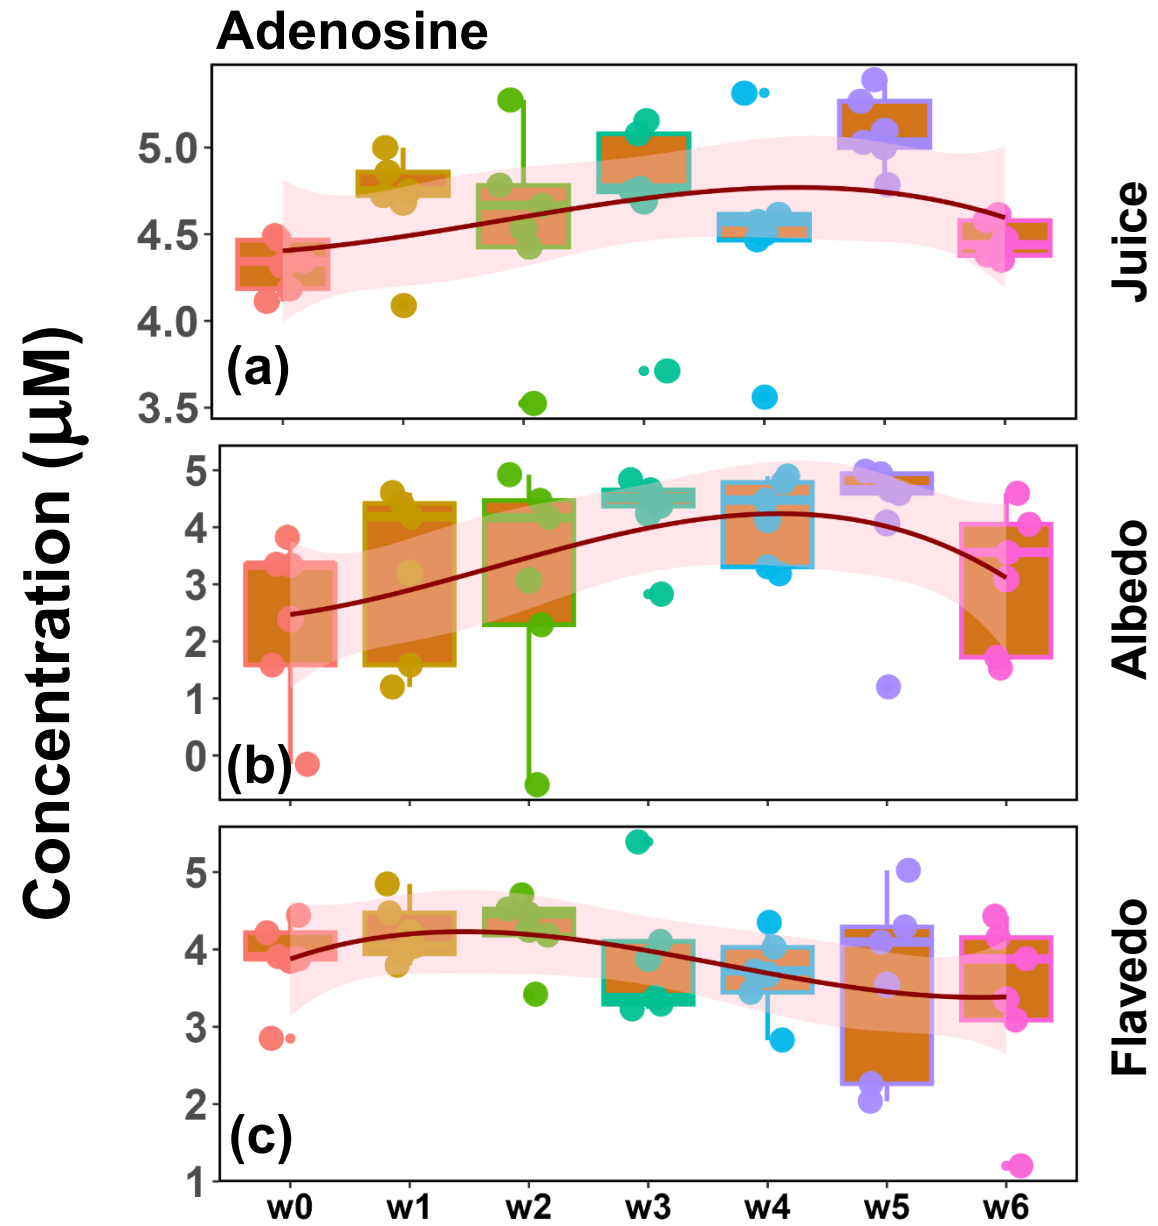

Figure S4: Weekly changes in adenosine levels in juice, albedo, and flavored.

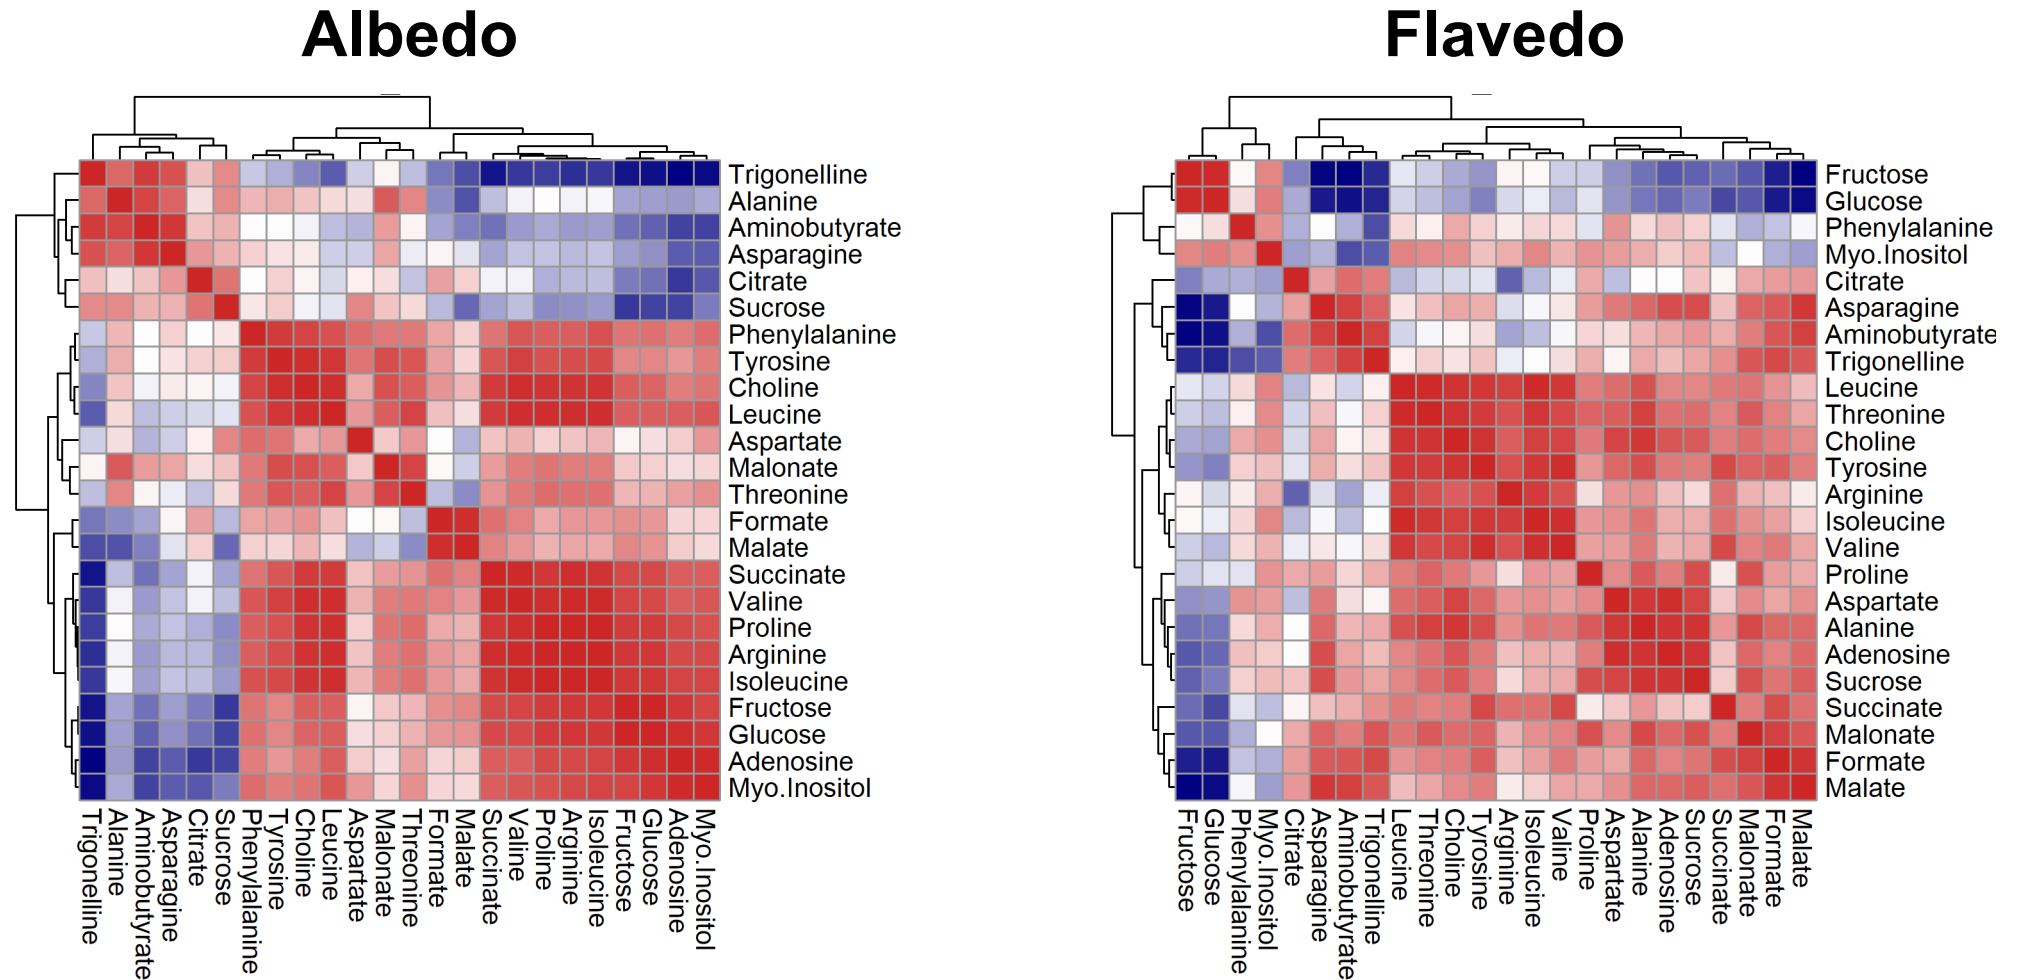

Figure S5: Correlation metabolites: Heat map depicts the correlation (Pearson) of the time-dependent variation of the NMR-measured metabolites.

| Juice                  |                |                |                |                |                |                |                |
|------------------------|----------------|----------------|----------------|----------------|----------------|----------------|----------------|
|                        | W0             | W1             | W2             | W3             | W4             | W5             | W6             |
| <b>4-Aminobutyrate</b> | 3.45 ± 0.53    | 3.10 ± 0.79    | 2.45 ± 0.83    | 2.13 ± 0.36    | 3.14 ± 1.65    | 2.98 ± 0.90    | 2.55 ± 0.55    |
| <b>Adenosine</b>       | 0.02 ± 0.002   | 0.03 ± 0.01    | 0.02 ± 0.01    | 0.03 ± 0.01    | 0.02 ± 0.01    | 0.03 ± 0.01    | 0.02 ± 0.002   |
| <b>Alanine</b>         | 1.93 ± 0.32    | 1.12 ± 0.41    | 1.07 ± 0.32    | 1.13 ± 0.26    | 1.58 ± 0.38    | 1.63 ± 0.63    | 1.32 ± 0.33    |
| <b>Arginine</b>        | 8.13 ± 1.38    | 7.93 ± 1.13    | 7.05 ± 1.19    | 7.86 ± 0.99    | 9.24 ± 2.13    | 8.61 ± 1.38    | 8.68 ± 3.06    |
| <b>Asparagine</b>      | 6.16 ± 1.95    | 6.29 ± 3.14    | 4.98 ± 1.60    | 4.50 ± 0.91    | 6.45 ± 1.49    | 6.36 ± 2.77    | 4.87 ± 1.71    |
| <b>Aspartate</b>       | 4.05 ± 0.46    | 4.26 ± 0.89    | 4.82 ± 0.54    | 4.07 ± 0.70    | 4.99 ± 1.74    | 4.93 ± 1.13    | 4.73 ± 0.75    |
| <b>Choline</b>         | 0.30 ± 0.06    | 0.27 ± 0.08    | 0.26 ± 0.07    | 0.32 ± 0.03    | 0.36 ± 0.08    | 0.36 ± 0.06    | 0.33 ± 0.11    |
| <b>Citrate</b>         | 42.19 ± 3.66   | 45.40 ± 11.18  | 45.00 ± 7.84   | 38.56 ± 5.45   | 47.25 ± 14.11  | 46.30 ± 11.30  | 54.66 ± 4.86   |
| <b>Formate</b>         | 0.44 ± 0.06    | 0.35 ± 0.05    | 0.19 ± 0.03    | 0.11 ± 0.03    | 0.12 ± 0.03    | 0.10 ± 0.02    | 0.33 ± 0.03    |
| <b>Fructose</b>        | 182.30 ± 10.72 | 181.76 ± 44.98 | 178.11 ± 46.25 | 198.70 ± 20.86 | 223.95 ± 30.79 | 214.37 ± 17.61 | 245.75 ± 38.81 |
| <b>Glucose</b>         | 184.22 ± 14.09 | 179.57 ± 50.39 | 181.88 ± 55.03 | 201.51 ± 30.41 | 237.43 ± 47.43 | 219.98 ± 14.00 | 285.86 ± 35.68 |
| <b>Isoleucine</b>      | 0.09 ± 0.02    | 0.07 ± 0.02    | 0.08 ± 0.02    | 0.09 ± 0.05    | 0.10 ± 0.04    | 0.12 ± 0.04    | 0.09 ± 0.02    |
| <b>Leucine</b>         | 0.09 ± 0.01    | 0.07 ± 0.02    | 0.08 ± 0.02    | 0.08 ± 0.04    | 0.09 ± 0.05    | 0.10 ± 0.03    | 0.09 ± 0.01    |
| <b>Malate</b>          | 20.37 ± 2.50   | 24.88 ± 4.78   | 21.39 ± 5.24   | 21.62 ± 4.90   | 22.80 ± 4.15   | 23.96 ± 3.60   | 21.91 ± 2.77   |
| <b>Malonate</b>        | 11.81 ± 3.56   | 10.16 ± 6.56   | 10.93 ± 2.58   | 10.94 ± 2.48   | 15.53 ± 4.95   | 15.84 ± 3.70   | 13.97 ± 3.58   |
| <b>Phenylalanine</b>   | 0.32 ± 0.07    | 0.28 ± 0.07    | 0.31 ± 0.10    | 0.40 ± 0.45    | 0.27 ± 0.09    | 0.35 ± 0.07    | 0.39 ± 0.19    |
| <b>Proline</b>         | 16.13 ± 8.06   | 12.01 ± 4.87   | 10.06 ± 2.68   | 13.95 ± 6.88   | 23.35 ± 12.09  | 19.18 ± 9.03   | 19.30 ± 8.70   |
| <b>Succinate</b>       | 0.10 ± 0.01    | 0.14 ± 0.04    | 0.10 ± 0.04    | 0.11 ± 0.05    | 0.10 ± 0.05    | 0.15 ± 0.08    | 0.11 ± 0.03    |
| <b>Sucrose</b>         | 190.35 ± 8.97  | 207.03 ± 37.58 | 196.17 ± 24.94 | 198.94 ± 15.44 | 210.75 ± 28.86 | 204.85 ± 5.57  | 166.27 ± 69.78 |
| <b>Threonine</b>       | 0.29 ± 0.04    | 0.25 ± 0.06    | 0.24 ± 0.04    | 0.25 ± 0.07    | 0.30 ± 0.07    | 0.32 ± 0.07    | 0.29 ± 0.03    |
| <b>Trigonelline</b>    | 0.10 ± 0.02    | 0.11 ± 0.02    | 0.09 ± 0.02    | 0.10 ± 0.02    | 0.14 ± 0.04    | 0.14 ± 0.03    | 0.13 ± 0.02    |
| <b>Tyrosine</b>        | 0.08 ± 0.02    | 0.08 ± 0.03    | 0.08 ± 0.03    | 0.07 ± 0.03    | 0.10 ± 0.04    | 0.11 ± 0.04    | 0.10 ± 0.01    |
| <b>Valine</b>          | 0.21 ± 0.04    | 0.17 ± 0.04    | 0.16 ± 0.05    | 0.22 ± 0.18    | 0.21 ± 0.08    | 0.24 ± 0.07    | 0.20 ± 0.04    |
| <b>myo-Inositol</b>    | 15.87 ± 2.22   | 16.06 ± 5.20   | 15.24 ± 3.90   | 16.40 ± 2.16   | 17.64 ± 3.14   | 19.80 ± 2.41   | 21.37 ± 2.45   |

Table S1 - Juice metabolite concentrations in mM with +/- standard deviations for each time period

| <b>Flavedo</b>         |               |              |              |               |               |               |               |
|------------------------|---------------|--------------|--------------|---------------|---------------|---------------|---------------|
|                        | <b>W0</b>     | <b>W1</b>    | <b>W2</b>    | <b>W3</b>     | <b>W4</b>     | <b>W5</b>     | <b>W6</b>     |
| <b>4-Aminobutyrate</b> | 1.12 ± 0.35   | 0.78 ± 0.21  | 0.62 ± 0.26  | 0.45 ± 0.12   | 0.50 ± 0.12   | 0.46 ± 0.25   | 0.40 ± 0.19   |
| <b>Adenosine</b>       | 0.02 ± 0.01   | 0.02 ± 0.01  | 0.02 ± 0.01  | 0.02 ± 0.01   | 0.01 ± 0.01   | 0.02 ± 0.01   | 0.01 ± 0.01   |
| <b>Alanine</b>         | 0.24 ± 0.05   | 0.26 ± 0.04  | 0.33 ± 0.07  | 0.23 ± 0.08   | 0.20 ± 0.05   | 0.21 ± 0.07   | 0.23 ± 0.08   |
| <b>Arginine</b>        | 0.78 ± 0.21   | 0.88 ± 0.19  | 1.17 ± 0.23  | 1.01 ± 0.40   | 0.69 ± 0.38   | 1.12 ± 0.33   | 1.08 ± 0.45   |
| <b>Asparagine</b>      | 0.54 ± 0.46   | 0.69 ± 0.69  | 0.58 ± 0.63  | 0.30 ± 0.38   | 0.18 ± 0.06   | 0.15 ± 0.13   | 0.11 ± 0.07   |
| <b>Aspartate</b>       | 0.40 ± 0.20   | 0.57 ± 0.12  | 0.68 ± 0.25  | 0.50 ± 0.12   | 0.35 ± 0.13   | 0.34 ± 0.15   | 0.32 ± 0.13   |
| <b>Choline</b>         | 0.26 ± 0.08   | 0.27 ± 0.05  | 0.34 ± 0.06  | 0.29 ± 0.10   | 0.24 ± 0.11   | 0.27 ± 0.12   | 0.29 ± 0.14   |
| <b>Citrate</b>         | 0.31 ± 0.09   | 0.16 ± 0.07  | 0.20 ± 0.06  | 0.16 ± 0.07   | 0.32 ± 0.35   | 0.15 ± 0.06   | 0.22 ± 0.12   |
| <b>Formate</b>         | 0.13 ± 0.03   | 0.09 ± 0.02  | 0.11 ± 0.03  | 0.07 ± 0.02   | 0.06 ± 0.04   | 0.07 ± 0.02   | 0.14 ± 0.04   |
| <b>Fructose</b>        | 20.18 ± 3.48  | 22.35 ± 6.34 | 26.13 ± 4.45 | 28.26 ± 6.55  | 32.48 ± 9.45  | 35.46 ± 17.17 | 35.00 ± 12.48 |
| <b>Glucose</b>         | 30.51 ± 11.66 | 31.90 ± 9.50 | 39.05 ± 8.60 | 44.20 ± 16.39 | 53.14 ± 16.75 | 48.49 ± 23.41 | 48.55 ± 22.33 |
| <b>Isoleucine</b>      | 0.07 ± 0.02   | 0.06 ± 0.02  | 0.10 ± 0.03  | 0.08 ± 0.03   | 0.06 ± 0.03   | 0.08 ± 0.03   | 0.12 ± 0.06   |
| <b>Leucine</b>         | 0.07 ± 0.02   | 0.07 ± 0.02  | 0.10 ± 0.03  | 0.08 ± 0.03   | 0.06 ± 0.03   | 0.08 ± 0.03   | 0.10 ± 0.05   |
| <b>Malate</b>          | 2.61 ± 0.65   | 1.89 ± 0.41  | 2.01 ± 0.66  | 1.36 ± 0.44   | 1.07 ± 0.75   | 0.98 ± 0.42   | 1.59 ± 0.71   |
| <b>Malonate</b>        | 1.34 ± 0.64   | 1.14 ± 0.14  | 1.53 ± 0.74  | 1.06 ± 0.54   | 1.03 ± 0.43   | 1.08 ± 0.44   | 0.98 ± 0.46   |
| <b>Phenylalanine</b>   | 0.27 ± 0.05   | 0.32 ± 0.15  | 0.31 ± 0.06  | 0.40 ± 0.11   | 0.30 ± 0.10   | 0.32 ± 0.21   | 0.33 ± 0.10   |
| <b>Proline</b>         | 5.10 ± 3.07   | 4.47 ± 0.89  | 6.12 ± 2.26  | 4.54 ± 2.28   | 5.25 ± 2.64   | 4.65 ± 2.77   | 5.76 ± 3.24   |
| <b>Succinate</b>       | 0.05 ± 0.02   | 0.04 ± 0.01  | 0.05 ± 0.01  | 0.04 ± 0.01   | 0.03 ± 0.02   | 0.04 ± 0.02   | 0.06 ± 0.03   |
| <b>Sucrose</b>         | 24.21 ± 12.34 | 26.07 ± 4.68 | 36.27 ± 8.98 | 22.34 ± 14.87 | 19.28 ± 8.94  | 13.34 ± 4.88  | 19.00 ± 12.01 |
| <b>Threonine</b>       | 0.25 ± 0.06   | 0.26 ± 0.06  | 0.33 ± 0.05  | 0.27 ± 0.10   | 0.23 ± 0.06   | 0.27 ± 0.10   | 0.35 ± 0.14   |
| <b>Trigonelline</b>    | 0.01 ± 0.01   | 0.01 ± 0.01  | 0.01 ± 0.01  | 0.01 ± 0.01   | 0.01 ± 0.01   | 0.01 ± 0.00   | 0.00 ± 0.00   |
| <b>Tyrosine</b>        | 0.13 ± 0.01   | 0.13 ± 0.05  | 0.22 ± 0.14  | 0.15 ± 0.07   | 0.09 ± 0.05   | 0.12 ± 0.04   | 0.19 ± 0.12   |
| <b>Valine</b>          | 0.08 ± 0.02   | 0.07 ± 0.01  | 0.10 ± 0.02  | 0.09 ± 0.04   | 0.07 ± 0.04   | 0.08 ± 0.03   | 0.12 ± 0.08   |
| <b>myo-Inositol</b>    | 3.37 ± 0.52   | 3.87 ± 1.17  | 4.78 ± 0.37  | 4.46 ± 1.30   | 4.32 ± 1.28   | 4.29 ± 2.20   | 5.02 ± 1.76   |

Table S2 - Flavedo metabolite concentrations in mM with +/- standard deviations for each time period

| <b>Albedo</b>          |              |              |              |              |               |               |               |
|------------------------|--------------|--------------|--------------|--------------|---------------|---------------|---------------|
|                        | <b>W0</b>    | <b>W1</b>    | <b>W2</b>    | <b>W3</b>    | <b>W4</b>     | <b>W5</b>     | <b>W6</b>     |
| <b>4-Aminobutyrate</b> | 0.78 ± 0.23  | 0.88 ± 0.37  | 0.44 ± 0.16  | 0.56 ± 0.17  | 0.60 ± 0.24   | 0.55 ± 0.23   | 0.49 ± 0.08   |
| <b>Adenosine</b>       | 0.01 ± 0.01  | 0.01 ± 0.01  | 0.02 ± 0.01  | 0.02 ± 0.01  | 0.02 ± 0.01   | 0.02 ± 0.01   | 0.01 ± 0.01   |
| <b>Alanine</b>         | 0.27 ± 0.09  | 0.34 ± 0.10  | 0.24 ± 0.09  | 0.26 ± 0.09  | 0.27 ± 0.05   | 0.25 ± 0.07   | 0.26 ± 0.04   |
| <b>Arginine</b>        | 0.32 ± 0.09  | 0.46 ± 0.11  | 0.37 ± 0.12  | 0.53 ± 0.08  | 0.82 ± 0.21   | 0.57 ± 0.18   | 0.50 ± 0.15   |
| <b>Asparagine</b>      | 0.31 ± 0.21  | 0.42 ± 0.48  | 0.17 ± 0.16  | 0.35 ± 0.52  | 0.21 ± 0.08   | 0.16 ± 0.09   | 0.11 ± 0.06   |
| <b>Aspartate</b>       | 0.24 ± 0.11  | 0.43 ± 0.18  | 0.41 ± 0.22  | 0.43 ± 0.15  | 0.41 ± 0.12   | 0.27 ± 0.13   | 0.20 ± 0.09   |
| <b>Choline</b>         | 0.17 ± 0.04  | 0.24 ± 0.02  | 0.17 ± 0.06  | 0.23 ± 0.04  | 0.37 ± 0.16   | 0.22 ± 0.07   | 0.21 ± 0.04   |
| <b>Citrate</b>         | 0.26 ± 0.14  | 0.22 ± 0.11  | 0.25 ± 0.21  | 0.17 ± 0.08  | 0.29 ± 0.19   | 0.15 ± 0.05   | 0.19 ± 0.12   |
| <b>Formate</b>         | 0.04 ± 0.01  | 0.03 ± 0.02  | 0.03 ± 0.01  | 0.04 ± 0.01  | 0.08 ± 0.05   | 0.03 ± 0.01   | 0.06 ± 0.01   |
| <b>Fructose</b>        | 23.61 ± 3.46 | 26.54 ± 6.23 | 24.17 ± 5.86 | 39.03 ± 2.69 | 45.18 ± 8.16  | 40.83 ± 16.47 | 43.09 ± 6.81  |
| <b>Glucose</b>         | 39.34 ± 5.42 | 45.65 ± 9.63 | 42.96 ± 9.53 | 67.74 ± 6.77 | 74.85 ± 20.81 | 67.44 ± 27.55 | 71.18 ± 16.55 |
| <b>Isoleucine</b>      | 0.02 ± 0.01  | 0.04 ± 0.01  | 0.03 ± 0.01  | 0.05 ± 0.02  | 0.07 ± 0.03   | 0.05 ± 0.02   | 0.05 ± 0.02   |
| <b>Leucine</b>         | 0.03 ± 0.01  | 0.05 ± 0.01  | 0.04 ± 0.01  | 0.05 ± 0.01  | 0.07 ± 0.01   | 0.05 ± 0.02   | 0.05 ± 0.01   |
| <b>Malate</b>          | 0.76 ± 0.20  | 0.76 ± 0.55  | 0.76 ± 0.43  | 0.78 ± 0.33  | 0.97 ± 0.61   | 0.75 ± 0.30   | 0.70 ± 0.12   |
| <b>Malonate</b>        | 0.97 ± 0.36  | 1.15 ± 0.24  | 0.90 ± 0.25  | 0.97 ± 0.28  | 1.15 ± 0.29   | 1.03 ± 0.35   | 1.03 ± 0.29   |
| <b>Phenylalanine</b>   | 0.18 ± 0.07  | 0.31 ± 0.09  | 0.20 ± 0.11  | 0.42 ± 0.28  | 0.42 ± 0.13   | 0.24 ± 0.16   | 0.25 ± 0.06   |
| <b>Proline</b>         | 3.29 ± 1.05  | 4.41 ± 1.18  | 3.44 ± 1.07  | 4.70 ± 1.33  | 6.31 ± 1.51   | 5.40 ± 2.69   | 5.37 ± 1.82   |
| <b>Succinate</b>       | 0.01 ± 0.00  | 0.02 ± 0.00  | 0.02 ± 0.01  | 0.02 ± 0.00  | 0.02 ± 0.01   | 0.02 ± 0.01   | 0.02 ± 0.00   |
| <b>Sucrose</b>         | 20.02 ± 8.18 | 26.68 ± 6.63 | 22.36 ± 7.45 | 16.47 ± 3.44 | 19.92 ± 5.36  | 11.83 ± 3.58  | 12.59 ± 3.19  |
| <b>Threonine</b>       | 0.14 ± 0.04  | 0.33 ± 0.19  | 0.18 ± 0.03  | 0.20 ± 0.03  | 0.26 ± 0.03   | 0.22 ± 0.07   | 0.25 ± 0.04   |
| <b>Trigonelline</b>    | 0.01 ± 0.01  | 0.01 ± 0.00  | 0.01 ± 0.00  | 0.01 ± 0.00  | 0.00 ± 0.00   | 0.00 ± 0.00   | 0.00 ± 0.00   |
| <b>Tyrosine</b>        | 0.05 ± 0.02  | 0.07 ± 0.02  | 0.05 ± 0.01  | 0.06 ± 0.02  | 0.09 ± 0.05   | 0.05 ± 0.02   | 0.07 ± 0.01   |
| <b>Valine</b>          | 0.03 ± 0.01  | 0.04 ± 0.01  | 0.03 ± 0.01  | 0.04 ± 0.01  | 0.07 ± 0.01   | 0.04 ± 0.02   | 0.05 ± 0.02   |
| <b>myo-Inositol</b>    | 3.68 ± 0.51  | 5.15 ± 0.68  | 5.16 ± 1.29  | 6.90 ± 0.69  | 6.84 ± 1.53   | 6.40 ± 2.18   | 7.03 ± 1.53   |

Table S3 - Albedo metabolite concentrations in mM with +/- standard deviations for each time period



### Brix and Acid % of Juice

|                   | W0           | W1           | W2           | W3           | W4           | W5           | W6           |
|-------------------|--------------|--------------|--------------|--------------|--------------|--------------|--------------|
| <b>Brix</b>       | 10.29 ± 1.84 | 11.26 ± 1.70 | 11.23 ± 2.11 | 12.34 ± 1.99 | 13.41 ± 2.22 | 13.13 ± 1.09 | 12.96 ± 2.09 |
| <b>Acid %</b>     | 0.77 ± 0.09  | 0.80 ± 0.22  | 0.79 ± 0.17  | 0.65 ± 0.14  | 0.73 ± 0.16  | 0.70 ± 0.10  | 0.70 ± 0.06  |
| <b>Brix/Acid%</b> | 13.68 ± 3.35 | 15.06 ± 4.76 | 14.70 ± 4.03 | 19.25 ± 2.56 | 18.68 ± 2.75 | 19.12 ± 2.70 | 18.52 ± 3.03 |

Table S4 - Brix and Acid% in Juice with +/- standard deviations for each time period
